# Supplementary material for: Different ecological demands shape differences in population structure and behaviour among the two generations of the small pearl-bordered fritillary
Source: PeerJ journal article supplement (doi:10.7717/peerj.16965), 2024-02-26
Supplement: Figure_S1.pdf [file Figure_S1.pdf]

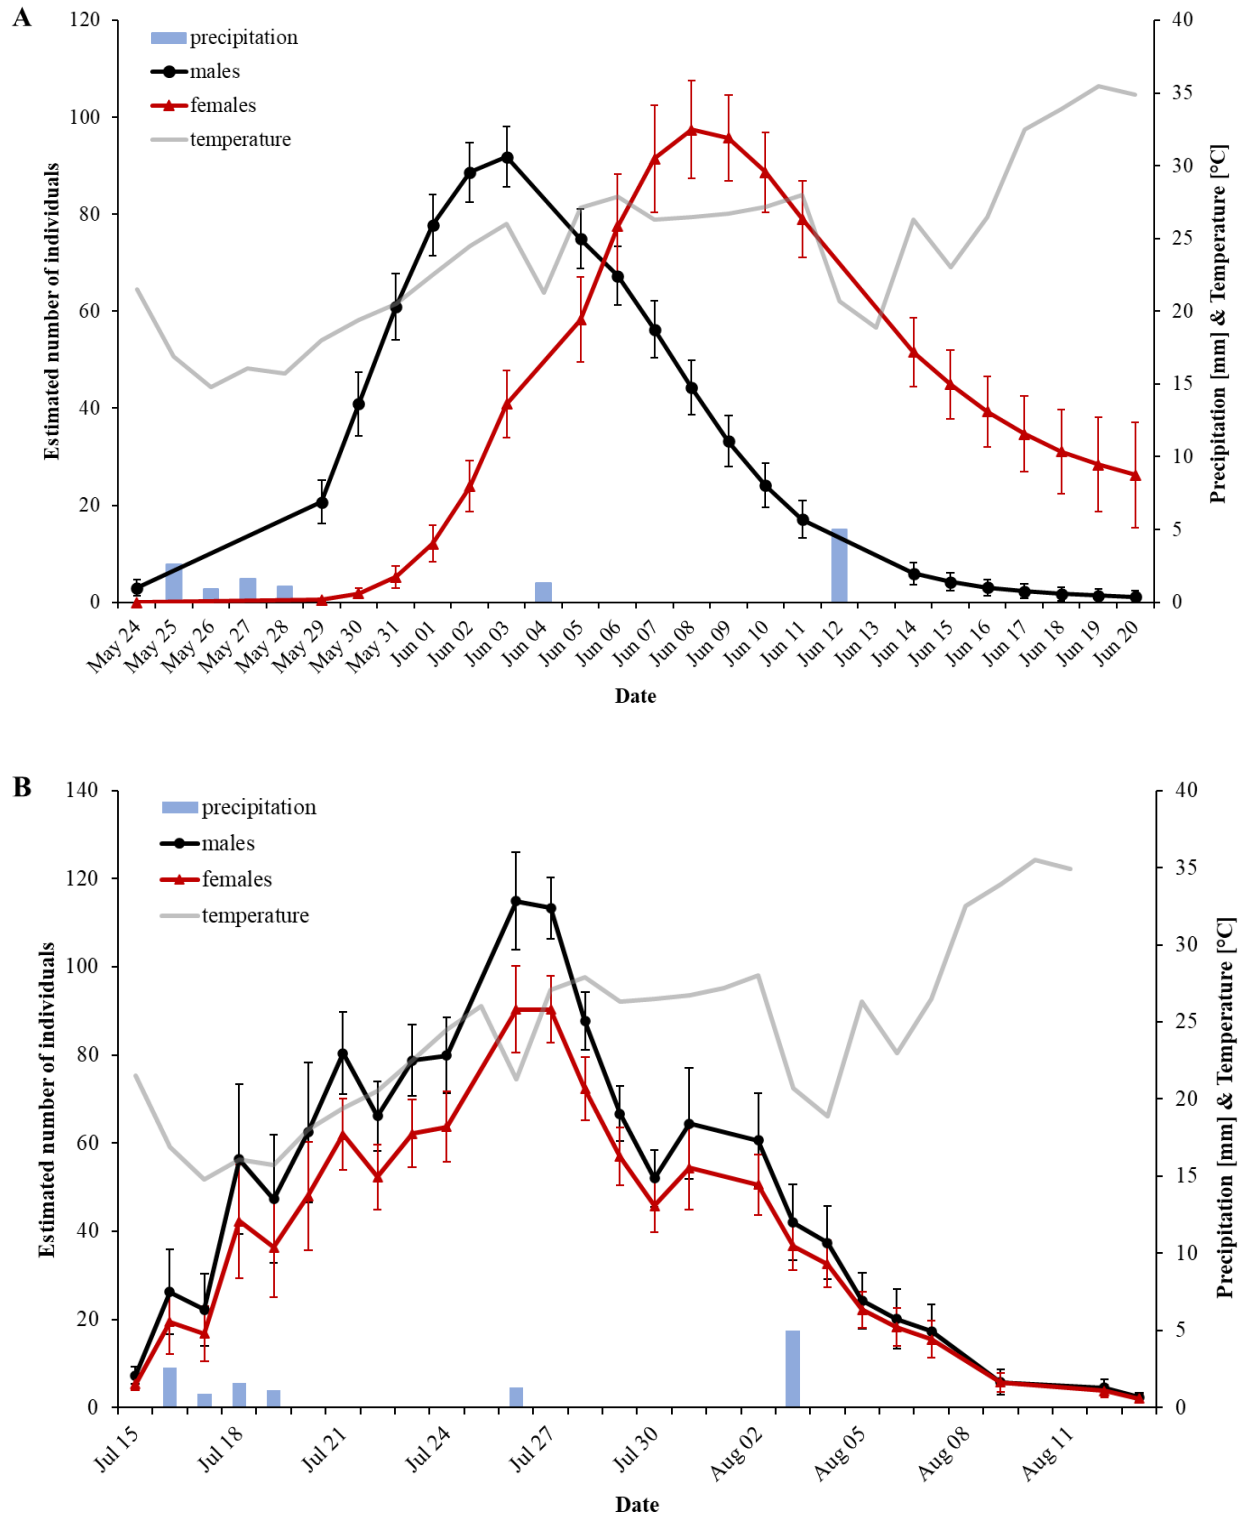

**Figure S1** Estimated daily population sizes of the first (a) and second (b) generation of *Boloria selene* for females (red) and males (blue); as grey bars the daily precipitation amount in mm and as yellow line the daily maximum temperature in °C (scales on the right).
