# Supplementary material for: Different ecological demands shape differences in population structure and behaviour among the two generations of the small pearl-bordered fritillary
Source: PeerJ journal article supplement (doi:10.7717/peerj.16965), 2024-02-26
Supplement: Figure_S2.pdf [file Figure_S2.pdf]

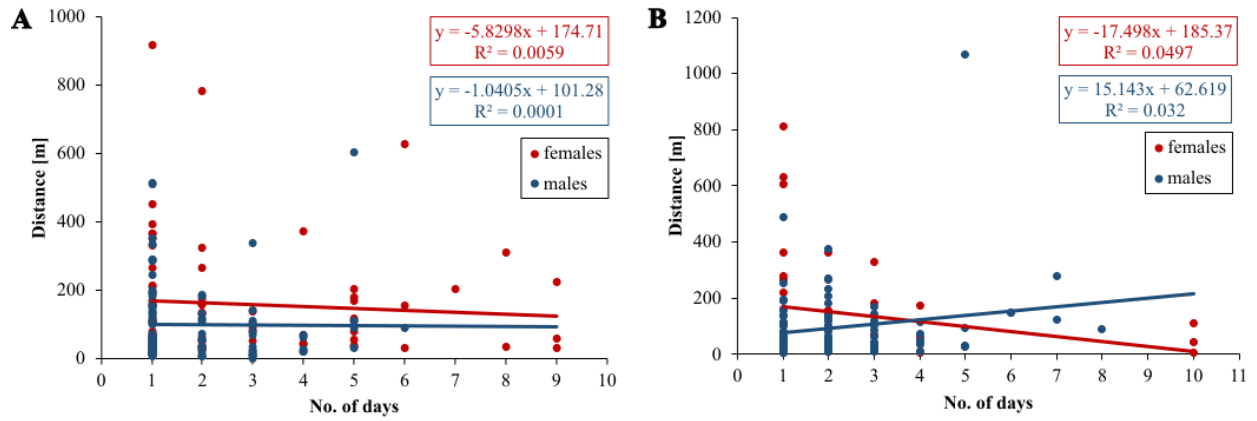

**Figure S2** Correlation of flight distance between capture and first recapture of *Boloria selene* and the number of days in-between; males in blue and females in red in the first (a) and second (b) generation.
