# Supplementary material for: Different ecological demands shape differences in population structure and behaviour among the two generations of the small pearl-bordered fritillary
Source: PeerJ journal article supplement (doi:10.7717/peerj.16965), 2024-02-26
Supplement: Figure_S3.pdf [file Figure_S3.pdf]

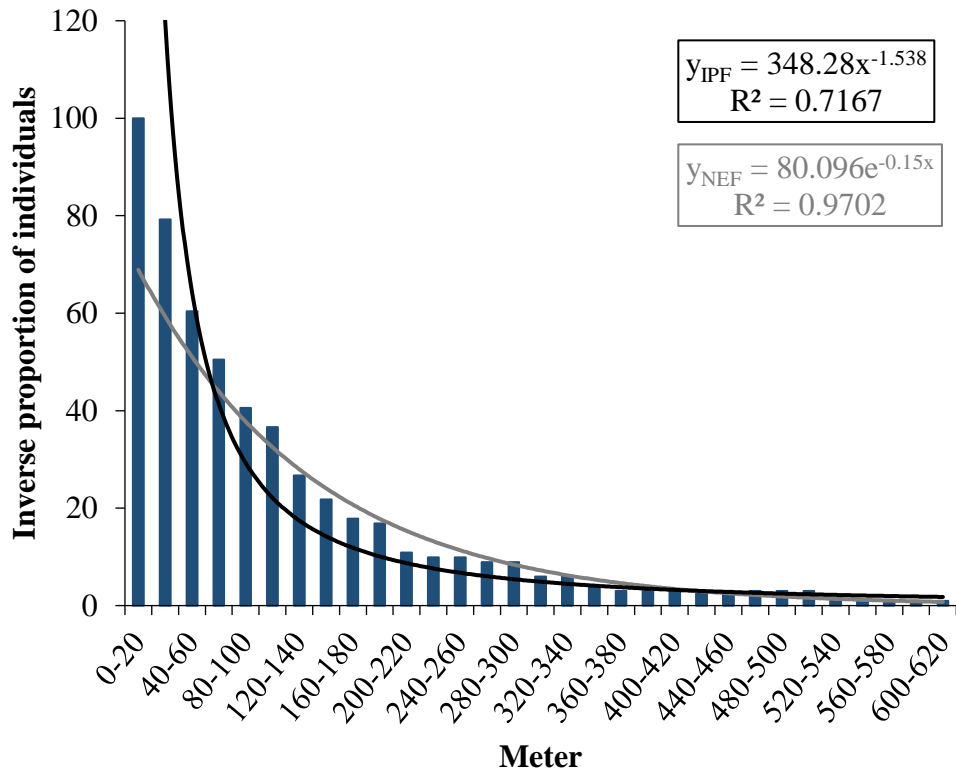

**Figure S3** Inverse proportion of *Boloria selene* males in the first generation reaching certain 20 m distance classes; fitted NEF (grey line) and IPF (black line).
