# Supplementary material for: Different ecological demands shape differences in population structure and behaviour among the two generations of the small pearl-bordered fritillary
Source: PeerJ journal article supplement (doi:10.7717/peerj.16965), 2024-02-26
Supplement: Figure_S5.pdf [file Figure_S5.pdf]

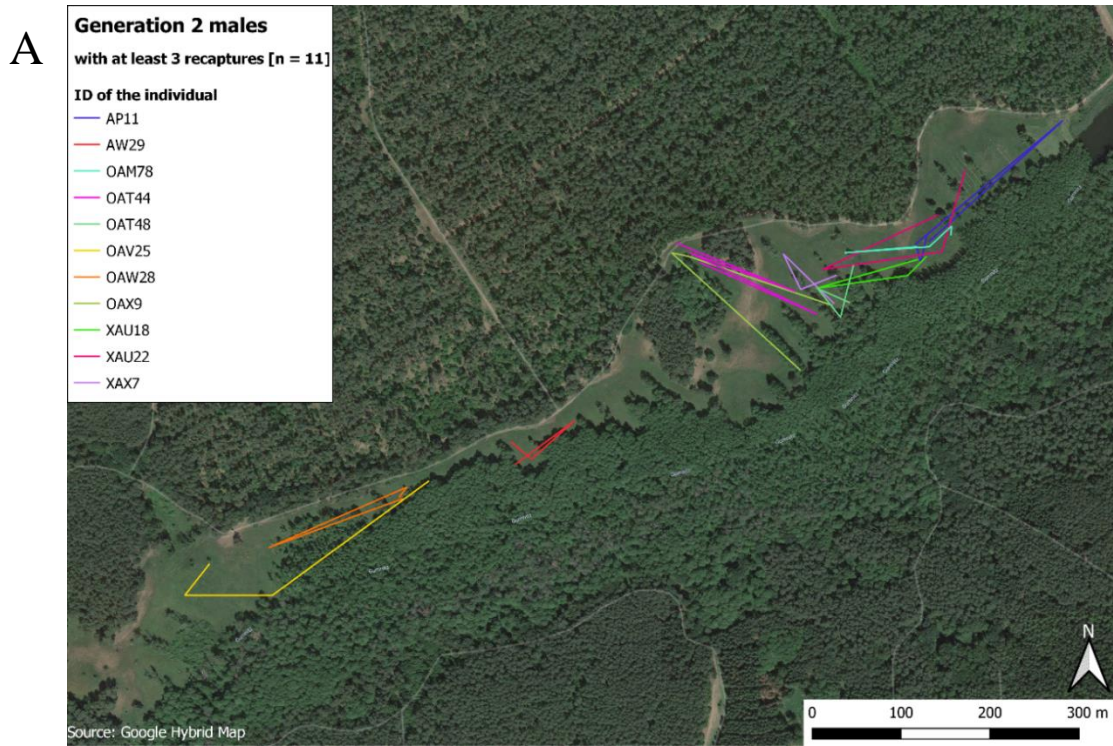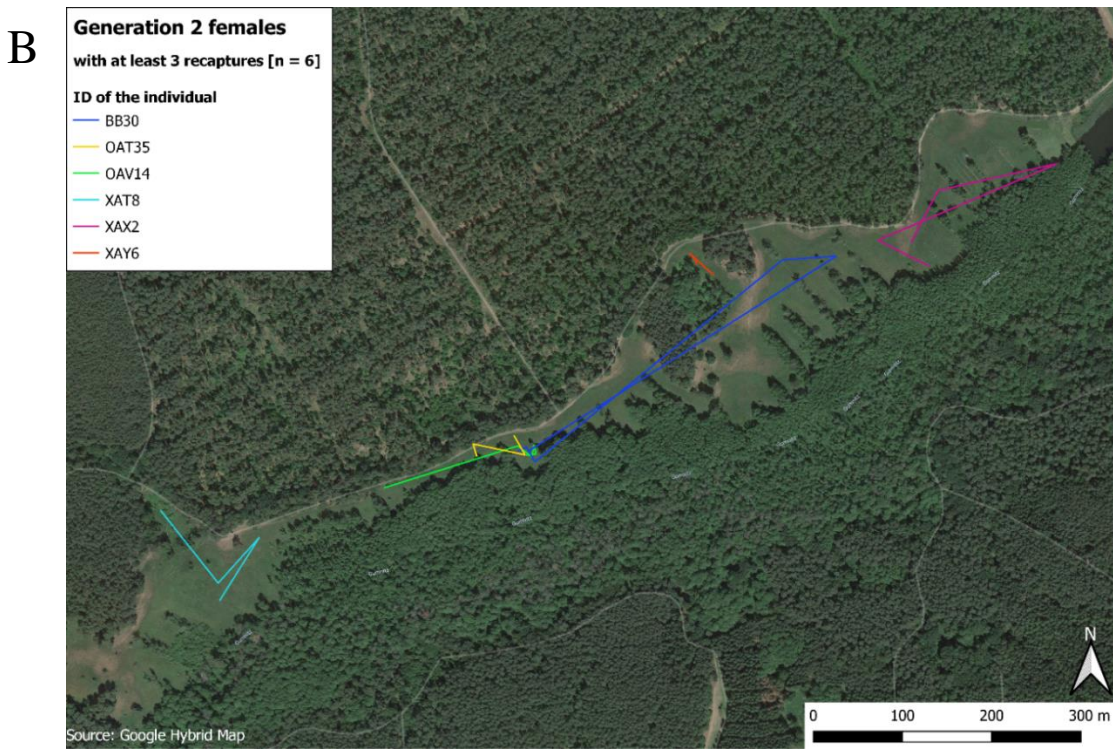

**Figure S5** Flight paths of *Boloria selene* males (a) and females (b) in the second generation; for presentation, the minimum number of recaptures was set to 3, to show approximately equal numbers of flight paths.
