# Supplementary material for: Different ecological demands shape differences in population structure and behaviour among the two generations of the small pearl-bordered fritillary
Source: PeerJ journal article supplement (doi:10.7717/peerj.16965), 2024-02-26
Supplement: Figure_S6.pdf [file Figure_S6.pdf]

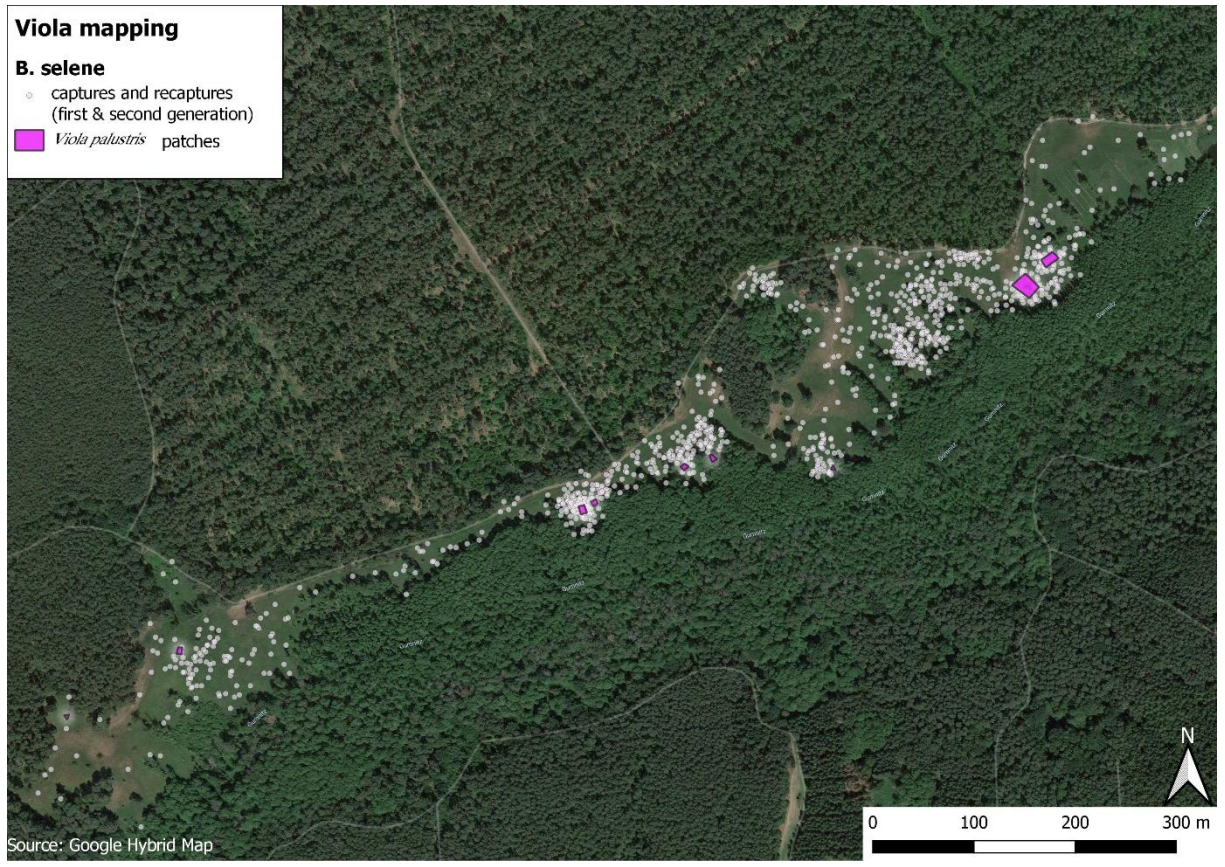

**Figure S6** Visualisation of mapped *Viola palustris* patches as violet polygons; captures and recaptures of *Boloria selene* individuals in both generations as grey points.
